# Supplementary material
Source: PubMed Central journal article supplement (PMC8549501)
Supplement: jvi.01471-21-s0002.pdf [file jvi.01471-21-s0002.pdf]

Movie S1: Shown in this movie is a morph simulation of the structure of the A'B/C'D'/E'F'/G'H' loops starting in the open conformation at neutral pH to the closed conformation as observed at low pH, in the presence of metals, or in the presence of bile salts. The G'H' loop is shown in blue with the acidic residues discussed in the text shown in red.
